# Supplementary material
Source: HighWire-hosted journal article supplement (http://jpet.aspetjournals.org/highwire/filestream/147420/field_highwire_adjunct_files/0/265538SupplDataPDF.pdf)

## Supplemental Materials

### **Parsaclisib Is a Next-Generation PI3K $\delta$ Inhibitor With Reduced Hepatotoxicity and Potent Antitumor and Immunomodulatory Activities in Models of B-Cell Malignancy**

Niu Shin, Matthew Stubbs, Holly Koblish, Eddy W. Yue, Maxim Soloviev, Brent Douty, Kathy He Wang, Qian Wang, Mingming Gao, Patricia Feldman, Gengjie Yang, Leslie Hall, Michael Hansbury, Sybil O'Connor, Lynn Leffet, Robert Collins, Kamna Katiyar, Xin He, Paul Waeltz, Paul Collier, Jin Lu, Yun-Long Li, Yanlong Li, Phillip C.C. Liu\*, Timothy Burn, Maryanne Covington, Sharon Diamond, Dana Shuey, Alan Roberts, Swamy Yeleswaram, Greg Hollis, Brian Metcalf\*, Wenqing Yao, Reid Huber\*, Andrew Combs\*, Robert Newton, and Peggy Scherle\*

*Incyte Research Institute, Wilmington, Delaware.*

\*Current affiliation: A. C. and P. S., Prelude Therapeutics, Inc., Wilmington, Delaware; R. H., Third Rock Ventures, Boston, Massachusetts; B. M., private consultant, Moraga, California; P. C. C. L., Kymera Therapeutics, Cambridge, Massachusetts.

## Supplementary Methods

### Chemicals, antibodies, and cell lines

Dimethylacetamide (#271012), methylcellulose (#M7027), and lysophosphatidic acid (#151884) were purchased from Sigma (St Louis, Missouri). Bendamustine (#3543-75-7) was purchased from Chemscene (Monmouth Junction, New Jersey). Platelet-derived growth factor (#120-HD) and complement component C5a (#2150-C5) were purchased from R&D Systems (Minneapolis, Minnesota). The anti-CD4-Alexa Fluor 700 (#557922), anti-CD8-FITC (#347313), anti-CD44-APC-Cy7 (#506568), anti-FOXP3-PE (#560046), and anti-CD62L-BUV737 (#741843) antibodies for fluorescence-activated cell sorting (FACS) analysis were purchased from BD Biosciences (Franklin Lakes, New Jersey). The anti-pAKT (Ser 473) antibody (#9271) for Western blotting and anti-pAKT (Ser 473)-Fluor 488 antibody (#4071) for FACS were purchased from Cell Signaling Technology (Danvers, Massachusetts). The anti-IgM antibody (#14-9998-82) for B-cell receptor stimulation was purchased from Invitrogen (Carlsbad, California). The anti-pAKT (Ser 473, #1861786), anti-AKT (#1861776), anti-rabbit (Dylight 800, #1861741), and anti-mouse (Dylight 680, #1861740) antibodies for In-Cell Western analysis were purchased from Thermo Scientific (Waltham, Massachusetts). A20 (#TIB-208), Pfeiffer (#CRL-2632), SU-DHL-6 (#CRL-2959), Jeko-1 (#CRL-3006), Mino (#CRL-300), Rec-1 (#CRL-3004), JVM2 (#CRL-3002), RAW264.7 (#TIB-71), Ramos (#CRL-1596), SKOV-3 (#HTB77), and PC-3 (#CRL-1435) cell lines were purchased from ATCC (Manassas, Virginia). SU-DHL-5 (#ACC 571), WILL-2 (#ACC 652), WSU-NHL (#ACC 58), SU-DHL-4 (#ACC 495), and SU-DHL-8 (#ACC 573) cell lines were obtained from DSMZ (Braunschweig, Germany).

SUPPLEMENTAL TABLE 1

Inhibitory activities of piasclisib against PI3K $\delta$ -mediated functions in cells

| Primary cell                | Stimulants                         | Response                   | IC <sub>50</sub> $\pm$ S.D. (nM) | N  |
|-----------------------------|------------------------------------|----------------------------|----------------------------------|----|
| Human B                     | Anti-human IgM Ab                  | Proliferation <sup>a</sup> | 0.21 $\pm$ 0.12                  | 4  |
| Human B                     | LPS + IL-4                         | Proliferation              | 0.73 $\pm$ 0.59                  | 6  |
| Human B                     | IL-4                               | Proliferation              | 0.47 $\pm$ 0.14                  | 6  |
| Human B                     | LPS                                | Proliferation              | 0.15 $\pm$ 0.02                  | 3  |
| Human B                     | CD40 ligand                        | Proliferation              | 0.72 $\pm$ 0.22                  | 4  |
| Human B                     | Anti-human CD40 Ab                 | Proliferation              | 0.42 $\pm$ 0.21                  | 5  |
| Human B                     | IL-6                               | Proliferation              | 0.59 $\pm$ 0.42                  | 3  |
| Human B                     | BAFF                               | Proliferation              | 0.53 $\pm$ 0.18                  | 7  |
| Mouse B                     | LPS + mIL-4 or mBAFF               | Proliferation              | 0.37 $\pm$ 0.31                  | 5  |
| Rat B                       | LPS + rIL-4 + anti-rat IgM         | Proliferation              | 1.19 $\pm$ 1.20                  | 3  |
| Dog B                       | Anti-canine IgM Ab                 | Proliferation              | 1.72                             | 2  |
| Human T                     | Anti-human CD3 Ab                  | Proliferation              | >1000                            | 4  |
| Human T                     | Anti-human CD28 Ab                 | Proliferation              | 96.63 $\pm$ 52.93                | 3  |
| Human T                     | Anti-human CD28 and CD3 Ab         | Proliferation              | >330                             | 3  |
| Human naïve T               | Th17 differentiation               | IL-17 production           | 0.90 $\pm$ 0.68                  | 11 |
| Human naïve T               | Th17 differentiation               | IFN- $\gamma$ production   | 0.65 $\pm$ 0.48                  | 9  |
| Human naïve T               | Th1 differentiation                | IFN- $\gamma$ production   | 0.73 $\pm$ 0.93                  | 6  |
| Human naïve T               | Th2 differentiation                | IL-13 production           | 0.26                             | 2  |
| Human memory T              | Anti-CD3 Ab                        | IL-17 production           | 0.98                             | 2  |
| Human memory T              | Anti-CD3 Ab                        | IFN- $\gamma$ production   | 0.97                             | 2  |
| Human memory T              | Anti-CD3 + anti-CD28 + anti-CD2 Ab | IL-17 production           | 1.12 $\pm$ 0.49                  | 5  |
| Human memory T              | Anti-CD3 + anti-CD28 + anti-CD2 Ab | IFN- $\gamma$ production   | 1.45 $\pm$ 1.49                  | 4  |
| Human NK                    | Human IL-2                         | Proliferation              | >1000                            | 2  |
| Human basophil <sup>b</sup> | Anti-FcR                           | CD63 expression            | 1.96 $\pm$ 1.37                  | 5  |

<sup>a</sup> Proliferation determined by <sup>3</sup>H-thymidine uptake; <sup>b</sup> The assay was conducted in the presence of whole blood. LPS, lipopolysaccharide.

SUPPLEMENTAL TABLE 2

Analysis of RNA sequencing data from the WILL-2 xenograft model. Please refer to separate Excel document

**Supplemental Fig. 1.** Parsaclisib is active against tumor growth in the Pfeiffer model for DLBCL. (A) Western blotting analysis showing reduction in the pAKT (Ser 473) level in the Pfeiffer xenograft tumors 4 hours after dosing with parsaclisib at 0.5 mg/kg and 1 mg/kg. (B) Pharmacokinetic analysis showing parsaclisib exposure level in the plasma of the mice bearing the Pfeiffer tumor. The IC<sub>90</sub> was covered for more than 8 hours when the compound was dosed at 1 mg/kg or 10 mg/kg.

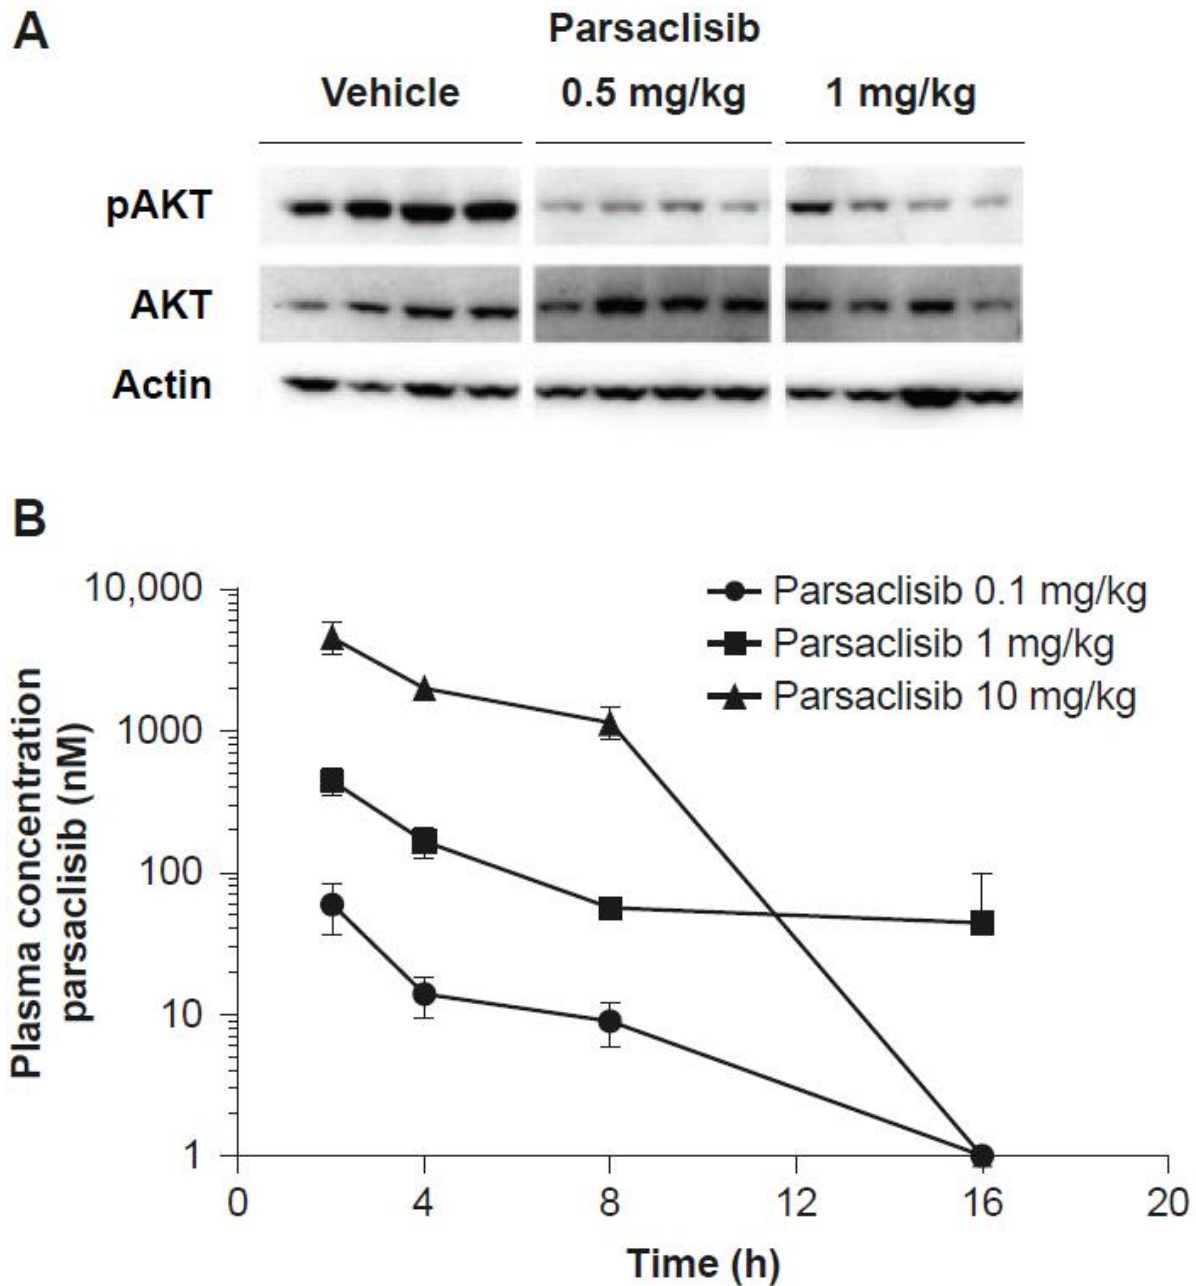

**Supplemental Fig. 2.** Effect of piasaclisib on different T-cell populations in the A20 model of lymphoma. Gating strategy in fluorescence-activated cell sorting (FACS) analysis of piasaclisib treatment-induced changes in Tregs (CD4<sup>+</sup>CD25<sup>+</sup>FOXP3<sup>+</sup>) (A) and memory (CD44<sup>+</sup>) CD4<sup>+</sup> and CD8<sup>+</sup> T-cell populations (B). (C) Effect of piasaclisib on the central memory (CD44<sup>+</sup>CD62L<sup>high</sup>) and effector memory (CD44<sup>+</sup>CD62L<sup>low</sup>) CD4<sup>+</sup> and CD8<sup>+</sup> T cells in spleens and tumors of the A20 model. In these studies, the mice were treated with piasaclisib at 10 mg/kg once daily or vehicle control for 7 days before being euthanized for collection and processing of tumors and spleens for FACS analysis.

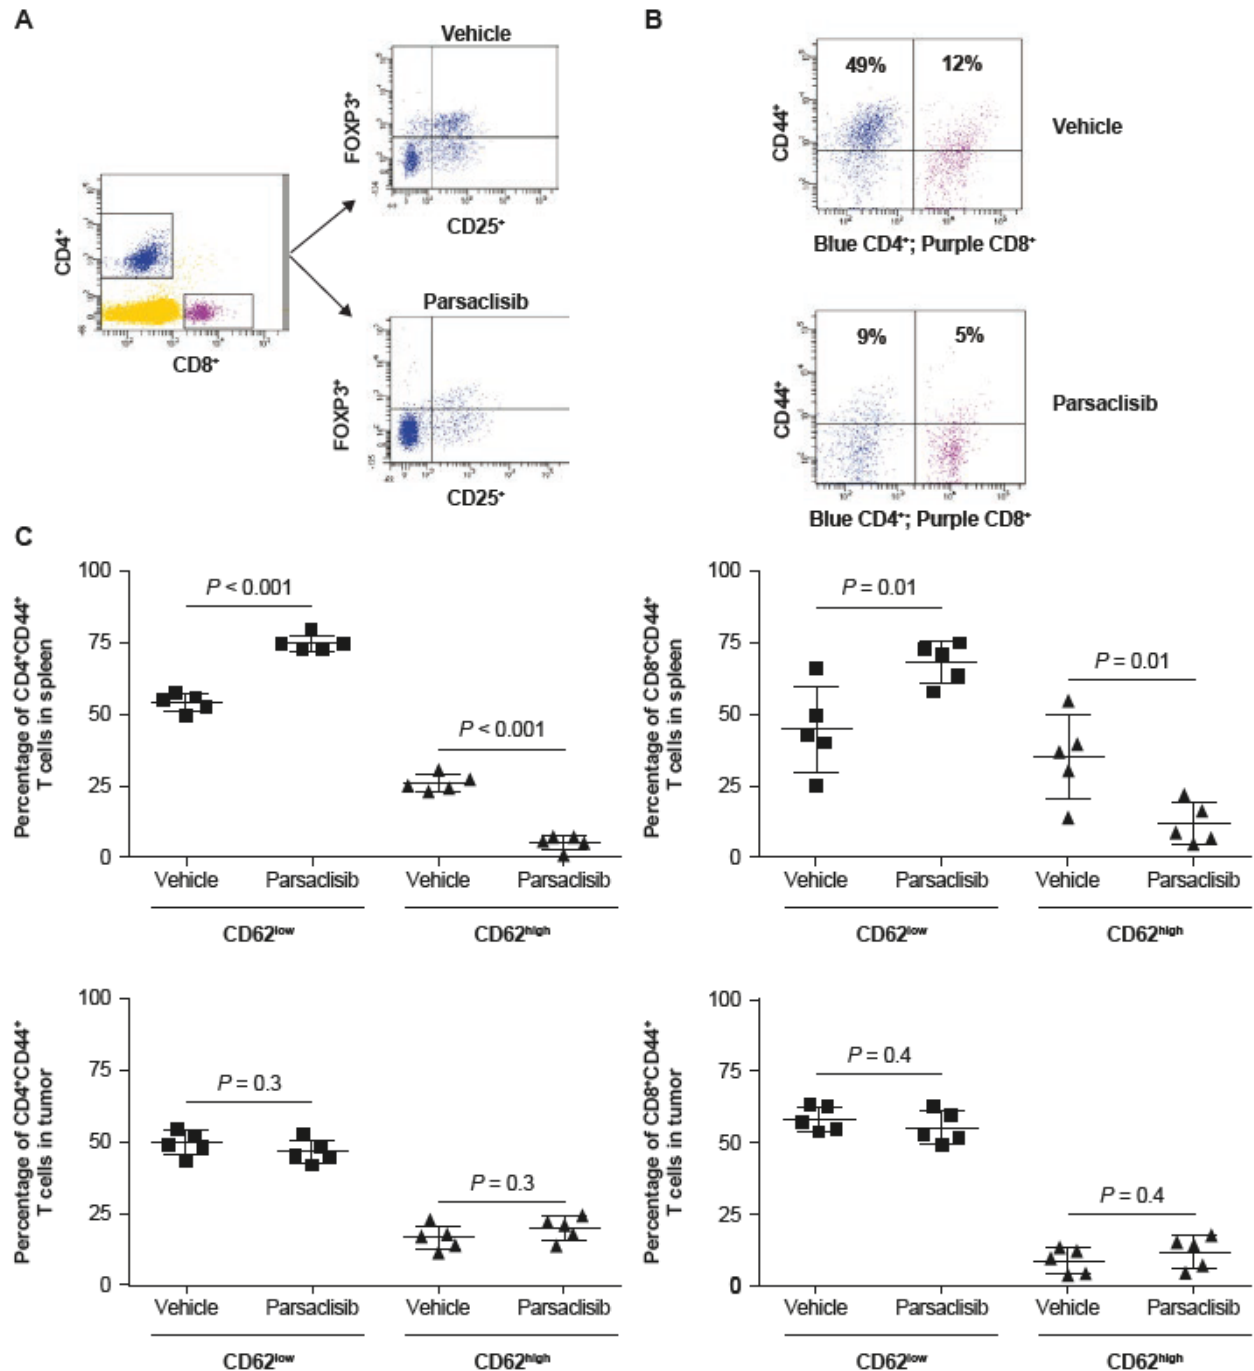

Supplement: 265538SupplDataPDF.pdf [file 265538SupplDataPDF.pdf]
